# Supplementary material
Source: MDPI journal article supplement (https://www.mdpi.com/2071-1050/8/4/378)
Supplement: s1 [file s1]

## Sheet: Figure 1
Figure 1. Sold active substances (1000 t) in selected European countries
Pesticide Sales [aei_fm_salpest]
Reference: Eurostat (2016)
Last update	16.07.2015
UNIT	Tonnes of active ingredient
	1980	1981	1982	1983	1984	1985	1986	1987	1988	1989	1990	1991	1992	1993	1994	1995	1996	1997	1998	1999	2000	2001	2002	2003	2004	2005	2006	2007	2008	2009	2010	2011	2012	2013
Denmark	#N/A	6115	6914	7465	7500	6863	6085	5485	5253	5795	5650	4628	4566	4103	3919	4809	3669	3757	3673	2929	2889	3127	2912	2991	2941	3299	3254	3354	4051			5284.56	5969.93	4205.01
Germany*	32750	31750	29500	31250	32501	30053	31384	36367	36774	34625	33146	34309	30399	25620	26732	30468	32080	30721	33644	30231	30331	27885	29531	30164	28753	29512	31819	32683	34664			43856	45521.2	43751.4
France	76958	80904	93394	87190	94460	98021	99697	92966	99167	100379	97701	103434	84709	91953	89515	84007	97889	109792	107753	120501	94694	99635	82448	74524	76099	78265	71612	77255				61335.9	63830.3	66659.5
Netherlands	#N/A	#N/A	#N/A	#N/A	19665	21002	21632	18088	18172	19146	18835	17307	15920	11702	11111	10924	9847	10399	10721	10196	9655	7987	8073	7868	9071	9309	9410	10740				10953.8	11348.4	10720.2
Sweden	4400	4757	4910	4233	4333	3660	5585	2409	2865	2423	2344	1837	1511	1464	1961	1224	1529	1608	1629	1698	1652	1738	1711	2049	942	1527	1707					2414.99	2366.91	2177.01
Norway**	1350	1340	1450	1410	1410	1410	1380	1200	1070	1000	1200	771	781	765	862	931	706	754	954	796	378	518	818	658	824	511	690	720				830.593	813.967	759.745
divided by 1000
Denmark		6.115	6.914	7.465	7.5	6.863	6.085	5.485	5.253	5.795	5.65	4.628	4.566	4.103	3.919	4.809	3.669	3.757	3.673	2.929	2.889	3.127	2.912	2.991	2.941	3.299	3.254	3.354	4.051			5.28456	5.96992	4.20501
Germany*	32.75	31.75	29.5	31.25	32.501	30.053	31.384	36.367	36.774	34.625	33.146	34.309	30.399	25.62	26.732	30.468	32.08	30.721	33.644	30.231	30.331	27.885	29.531	30.164	28.753	29.512	31.819	32.683	34.664			43.856	45.5212	43.7514
France	76.958	80.904	93.394	87.19	94.46	98.021	99.697	92.966	99.167	100.379	97.701	103.434	84.709	91.953	89.515	84.007	97.889	109.792	107.753	120.501	94.694	99.635	82.448	74.524	76.099	78.265	71.612	77.255				61.3359	63.8303	66.6595
Netherlands					19.665	21.002	21.632	18.088	18.172	19.146	18.835	17.307	15.92	11.702	11.111	10.924	9.847	10.399	10.721	10.196	9.655	7.987	8.073	7.868	9.071	9.309	9.41	10.74				10.9538	11.3484	10.7202
Sweden	4.4	4.757	4.91	4.233	4.333	3.66	5.585	2.409	2.865	2.423	2.344	1.837	1.511	1.464	1.961	1.224	1.529	1.608	1.629	1.698	1.652	1.738	1.711	2.049	0.942	1.527	1.707					2.41499	2.36691	2.17701
Norway**	1.35	1.34	1.45	1.41	1.41	1.41	1.38	1.2	1.07	1	1.2	0.771	0.781	0.765	0.862	0.931	0.706	0.754	0.954	0.796	0.378	0.518	0.818	0.658	0.824	0.511	0.69	0.72				0.830593	0.813967	0.759745
*until 1990 former territory of the FRG
**until 1990 estimated according to Spikkerud (2005)

## Sheet: Figure 2
Figure 2. Development of Swedish pesticide risk indicator with respect to environmental and human health risks.
Reference	http://www.miljomal.se/Miljomalen/Alla-indikatorer/Indikatorsida/Dataunderlag-for-indikator/?iid=139&pl=1&t=Land&l=SE
Year	Risks for human health	Risks for the environment	Dose/ha
1988	100	100	100
1989	74.38	92.22	98.35
1990	96.66	87.69	93.95
1991	97.36	68.61	78.38
1992	69.93	61.7	71.27
1993	50.93	54.88	64.82
1994	58.58	85.54	106.99
1995	22.13	56.32	73.62
1996	25.41	65.83	89.9
1997	28.7	69.7	102.51
1998	31.07	72.01	97.68
1999	36.96	81.78	111.97
2000	26.83	73.27	97.33
2001	22.32	70.12	96.55
2002	23.26	68.62	90.62
2003	25.06	68.57	101.91
2004	21.97	49.81	80.26
2005	26.33	63.63	95.6
2006	29.02	68.7	102.04
2007	32.63	66.73	105.1
2008	32	65.25	115.71
2009	27.06	60.23	93.9
2010	23.06	54.39	93.64
2011	25.6	65.48	105.97
2012	27.43	69.95	125.75
2013	26.58	79.13	122.7
2014	27.72	79.24	136.17
Swedish EPA	Naturvårdsverket

## Sheet: Figure 3
Figure 3. Development of the Norwegian pesticide risk indicator with respect to environmental and human health risks as well as total annual sales based on retailers’ sales data
Reference:	Strøm Prestvik, A . NIBIO—Norwegian Institute of Bioeconomy Research, Ås, Akershus, Norway. Personal communication, 2015.
		1997	Average 96-97	1998	1999	2000	2001	2002	2003	2004	2005	2006	2007	2008	2009	2010	2011
Sold quantity	706.2	754.2	730.2	954.6	796.3	380.2	518.7	818.5	688.5	869	523.5	719.9	750.7	820.9	580.5	736.8	865
Human health risk	1.04631e+07	1.19159e+07	1.11895e+07	1.73427e+07	1.28597e+07	4.07134e+06	6.55963e+06	1.02136e+07	9.66159e+06	1.18302e+07	6.41937e+06	8.90762e+06	8.27798e+06	9926674	7.13055e+06	8222253	9.88531e+06
Environmental risk	5.07482e+08	5.46519e+08	5.27e+08	1.02818e+09	7.17863e+08	1.55784e+08	2.59052e+08	4.8447e+08	5.11797e+08	7.9293e+08	2.9103e+08	4.44635e+08	4.86703e+08	4.64862e+08	3.89429e+08	3.02705e+08	3.9255e+08
Indexed
			Ø 1996-97	1998	1999	2000	2001	2002	2003	2004	2005	2006	2007	2008	2009	2010	2011
Sold quantity			100	130.731	109.052	52.0679	71.0353	112.093	94.2892	119.008	71.6927	98.5894	102.807	112.421	79.4988	100.904	118.461
Human health risk			100	154.991	114.927	36.3853	58.6231	91.2784	86.3452	105.726	57.3696	79.6069	73.9799	88.7142	63.7254	73.4819	88.3446
Environmental risk			100	195.101	136.217	29.5604	49.1559	91.9297	97.1152	150.461	55.2238	84.371	92.3534	88.2091	73.8954	57.4392	74.4875
